# Supplementary material for: Aberrant myelomonocytic CD56 expression predicts response to cyclosporine therapy in pediatric patients with moderate aplastic anemia
Source: PubMed Central journal article supplement (PMC10751928; doi:10.3389/fped.2023.1272593), 2023-12-12
Supplement: Image1.pdf [file Image1.pdf]

**Supplemental Figure and Figure legend**

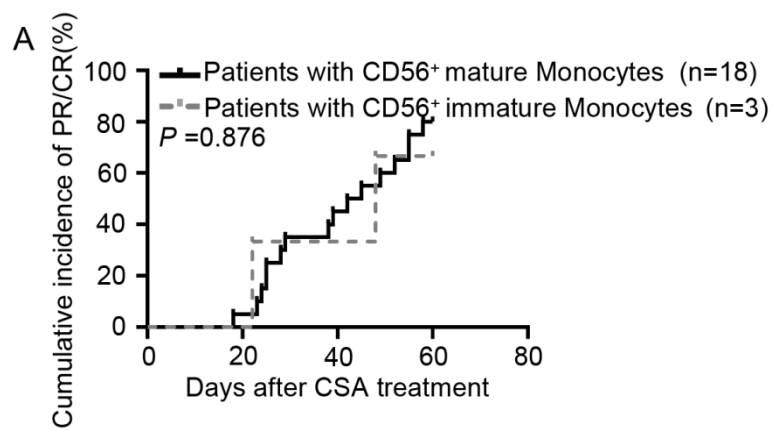

**Supplemental Figure 1.** (A) Cumulative PR or CR incidence of patients with CD56<sup>+</sup> mature monocytes and CD56<sup>+</sup> immature monocytes after cyclosporine treatment ( $P = 0.876$ ).
